# Supplementary material for: A galinstan-based inkjet printing system for highly stretchable electronics with self-healing capability
Source: Royal Society of Chemistry journal article supplement (doi:10.1039/c6lc00046k), 2016-01-01
Supplement: c6lc00046k1.pdf [file c6lc00046k1.pdf]

## Electronic Supplementary Information

### **Galinstan-based inkjet printing system for highly stretchable electronics with self-healing capability**

*Guangyong Li, Xuan Wu, and Dong-Weon Lee\**

*MEMS and Nanotechnology Laboratory, School of Mechanical Engineering,*

*Chonnam National University, Gwangju, 61186, South Korea*

(\*Corresponding author: Tel: +82-62-530-1684; E-mail: [mems@jnu.ac.kr](mailto:mems@jnu.ac.kr))

Contents:

- 1)** Reduction of oxidized Galinstan in coplanar channels
- 2)** Behavior of Galinstan in the nozzle surrounded by the coplanar channels without and with 37 wt% HCl solution.
- 3)** Experimental and simulation results of the minimum flow rate required for the formation of a Galinstan droplet for different-size nozzles
- 4)** Schematic of Galinstan-based inkjet printing system
- 5)** Relationship between Galinstan flow rate and the X-Y-Z stage velocity.
- 6,)** Video for HCl vapor-treated Galinstan droplet directly rolling on PDMS substrate.
- 7,)** Video for HCl vapor-treated Galinstan injected from syringe needle
- 8)** Video for self-healing (connection) or self-reconnection capability test

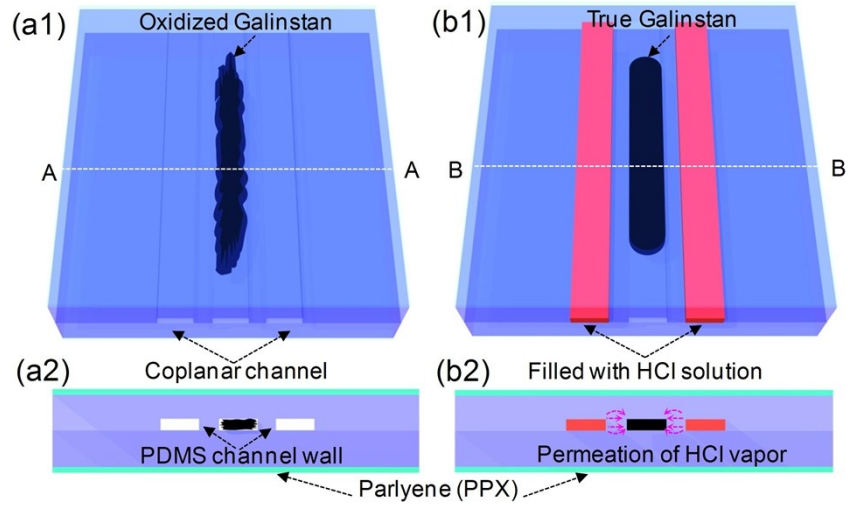

**Fig. S1.** 3D (a1 and b1) and cross sectional (a2 and b2) views of coplanar channels filled with Galinstan and HCl solution.

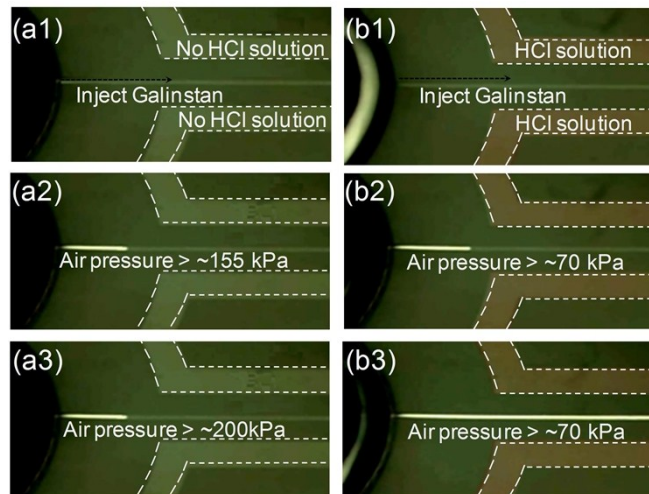

**Fig. S2.** Behavior of Galinstan in the nozzle surrounded by a coplanar channel (a) without HCl solution and (b) filled with 37 wt% HCl solution.

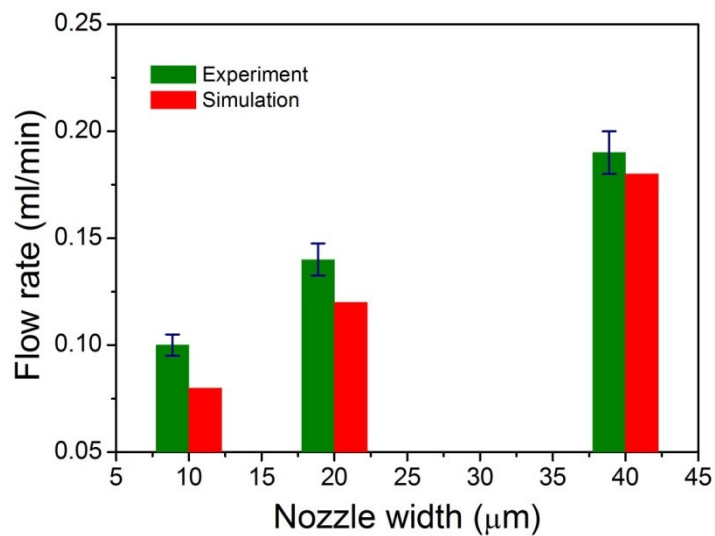

**Fig. S3.** Experimental and simulation results for the minimum flow rate required for the formation of a Galinstan droplet for different-size nozzles (cross-section size: 40  $\mu\text{m}$  width  $\times$  10  $\mu\text{m}$  height, 20  $\mu\text{m}$  width  $\times$  10  $\mu\text{m}$  height, 10  $\mu\text{m}$  width  $\times$  10  $\mu\text{m}$  height).

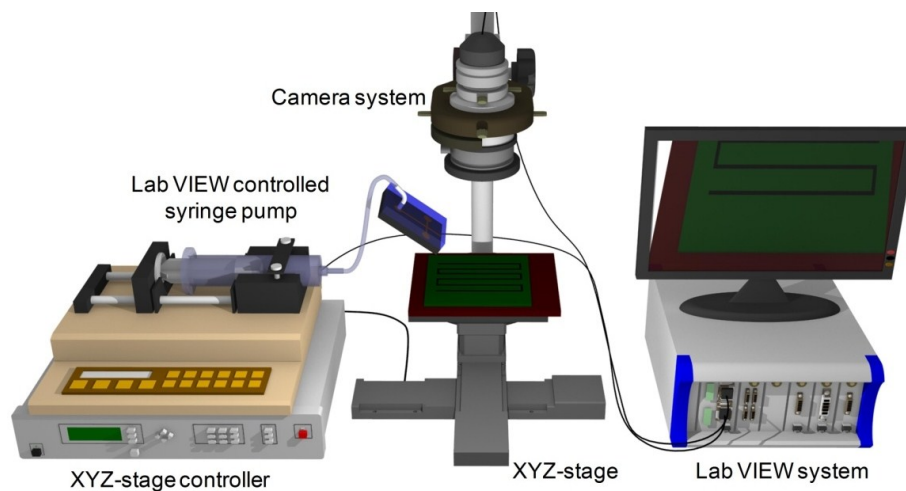

**Fig. S4.** Galinstan-based inkjet printing system comprising a CCD camera system, Lab VIEW controlled syringe pump, X-Y-Z stage, and a nozzle device.

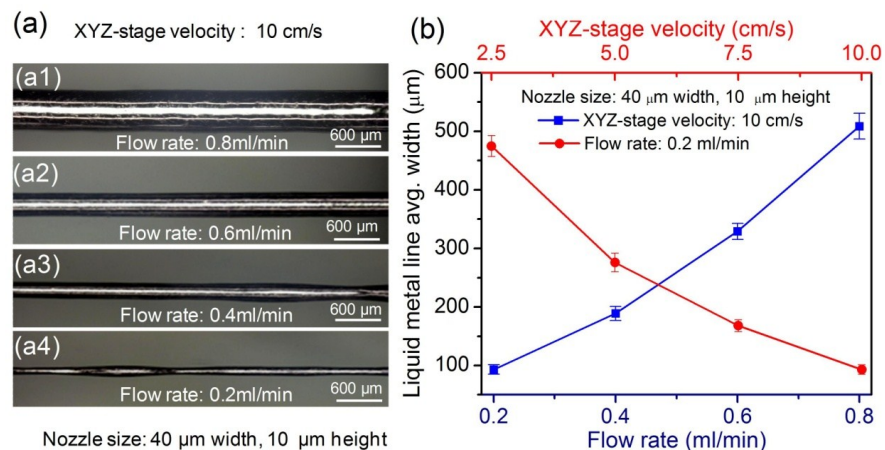

**Fig. S5.** Relationship between Galinstan flow rate and the X-Y-Z stage velocity. (a) Microscope images of Galinstan lines formed on the substrate with different flow rates. (b) The width of the Galinstan line as a function of the Galinstan flow rate and the X-Y-Z stage velocity.

**Video: SV. 1.** Video for HCl vapor-treated Galinstan droplet directly rolling on PDMS substrate.

**Video: SV. 2.** Video for HCl vapor-treated Galinstan injected from syringe needle.

**Video: SV. 3.** Video for self-healing (connection) or self-reconnection capability test
